# Supplementary material for: Activation of autophagy is required for clearance of mitochondrial ROS in patients with asthenozoospermia
Source: PeerJ. 2025 Feb 13;13:e18827. doi: 10.7717/peerj.18827 (PMC11830362; doi:10.7717/peerj.18827)
Supplement: Supplemental Information 2 [file peerj-13-18827-s002.xlsx]

## Sheet: Sheet1
NS	AS
649.959	482.249
643.726	169.753
678.76	201.184
